# Supplementary material for: Anion-dependent construction of copper(i/ii)-1,2,4,5-tetra(4-pyridyl)benzene frameworks
Source: Royal Society of Chemistry journal article supplement (doi:10.1039/c0ce00141d), 2010-01-01
Supplement: c0ce00141d.pdf [file c0ce00141d.pdf]

---

Supplementary Material (ESI) for CrystEngComm  
This journal is © The Royal Society of Chemistry 2010

***Electronic supplementary information (ESI)***

**Anion-Dependent Construction of Copper(I/II)-1,2,4,5-tetra(4-pyridyl)benzene Frameworks**

***Sheng Hu,<sup>ab</sup> Ze-Ming Zhang,<sup>a</sup> Zhao-Sha Meng,<sup>a</sup> Zhuo-Jia Lin\*,<sup>a</sup> and Ming-Liang Tong\*<sup>a</sup>***

<sup>a</sup> *Key Laboratory of Bioinorganic and Synthetic Chemistry of Ministry of Education, State Key Laboratory of Optoelectronic Materials and Technologies, School of Chemistry & Chemical Engineering, Sun Yat-Sen University, Guangzhou 510275, China. E-mail: [tongml@mail.sysu.edu.cn](mailto:tongml@mail.sysu.edu.cn)*

<sup>b</sup> *Faculty of Chemical Engineering and Light Industry, Guangdong University of Technology, Guangzhou 510006, China.*

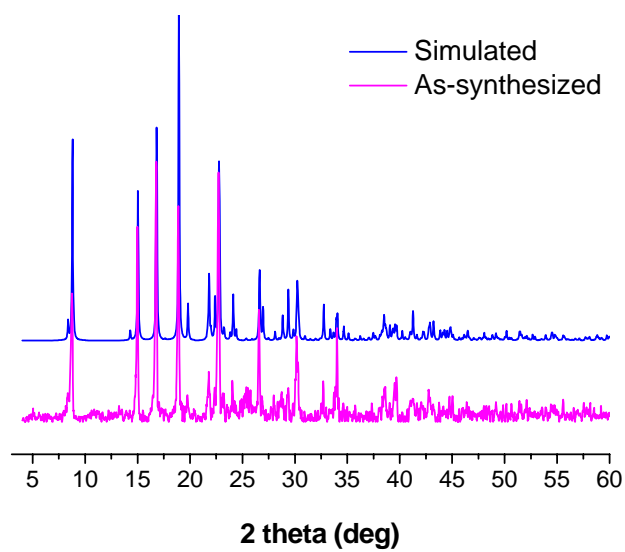

**Fig. S1.** X-ray powder diffraction (XRPD) patterns of **1**.

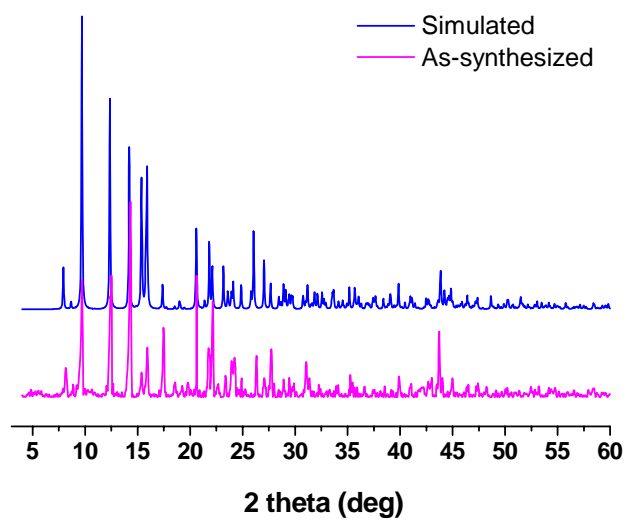

**Fig. S1.** X-ray powder diffraction (XRPD) patterns of **3**.

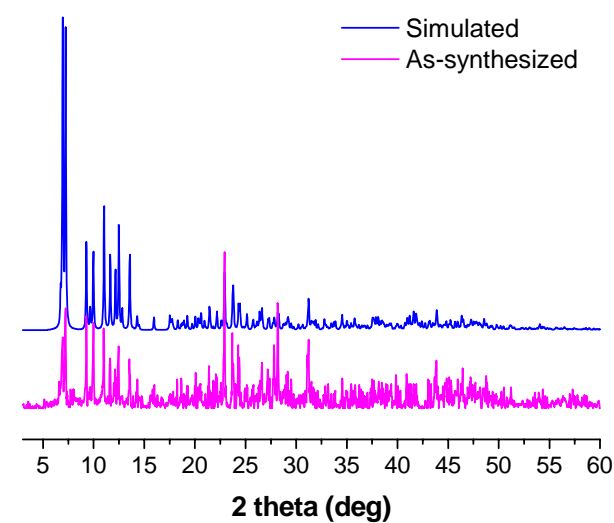

**Fig. S1.** X-ray powder diffraction (XRPD) patterns of **4**.
